# Supplementary material for: Development and Validation of Novel Deep-Learning Models Using Multiple Data Types for Lung Cancer Survival
Source: MDPI journal article supplement (doi:10.3390/cancers14225562), 2022-11-12
Supplement: s1 [file s1]

## Supplementary Materials

### Development and Validation of Machine Learning Algorithms for Lung Cancer Survival based on Real-world Data

|                                                                           |    |
|---------------------------------------------------------------------------|----|
| FIGURE S1. COHORT SELECTION PROCESS .....                                 | 2  |
| FIGURE S2. FEATURE IMPORTANCE OF THE GBM PREDICTION MODEL OF MODE 4.....  | 3  |
| TABLE S1. DETAILED DEMOGRAPHIC CHARACTERISTICS OF COHORT PATIENTS.....    | 4  |
| TABLE S2. DETAILED PERFORMANCE OF VARIOUS PREDICTION MODELS BY MODES..... | 11 |

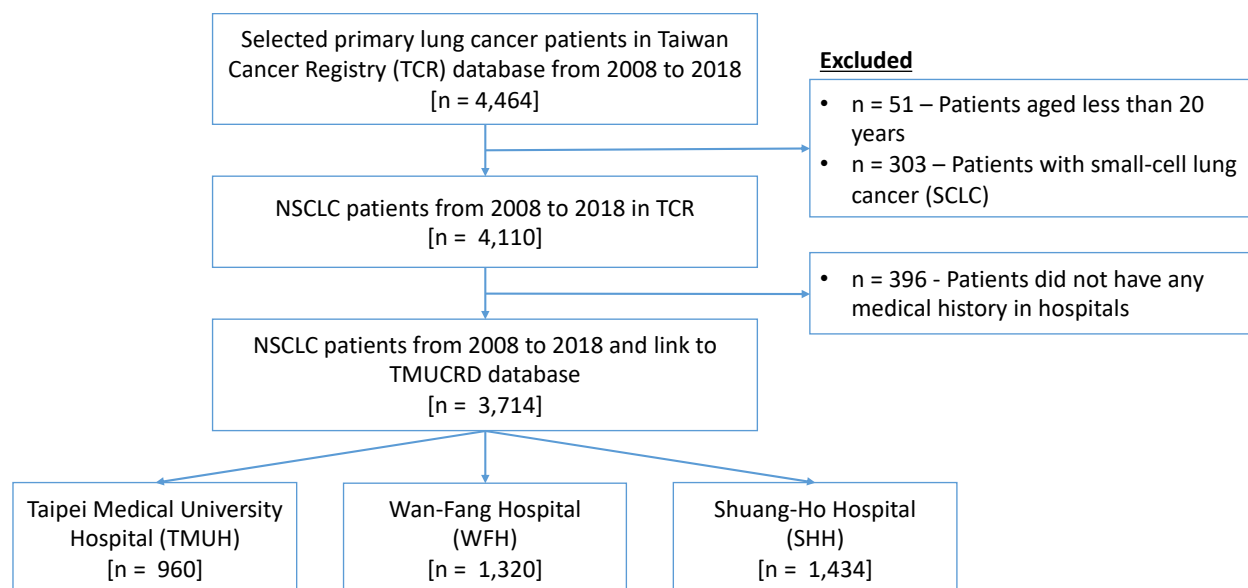

**Figure S1.** Cohort Selection Process

**Note:** TCR, Taiwan cancer registry; NSCLC, Non-small-cell lung cancer; TMUCRD, Taipei Medical University clinical research database; TMUH, Taipei Medical University hospital; WFH, Wan-Fang hospital; SHH, Shuang-Ho hospital;

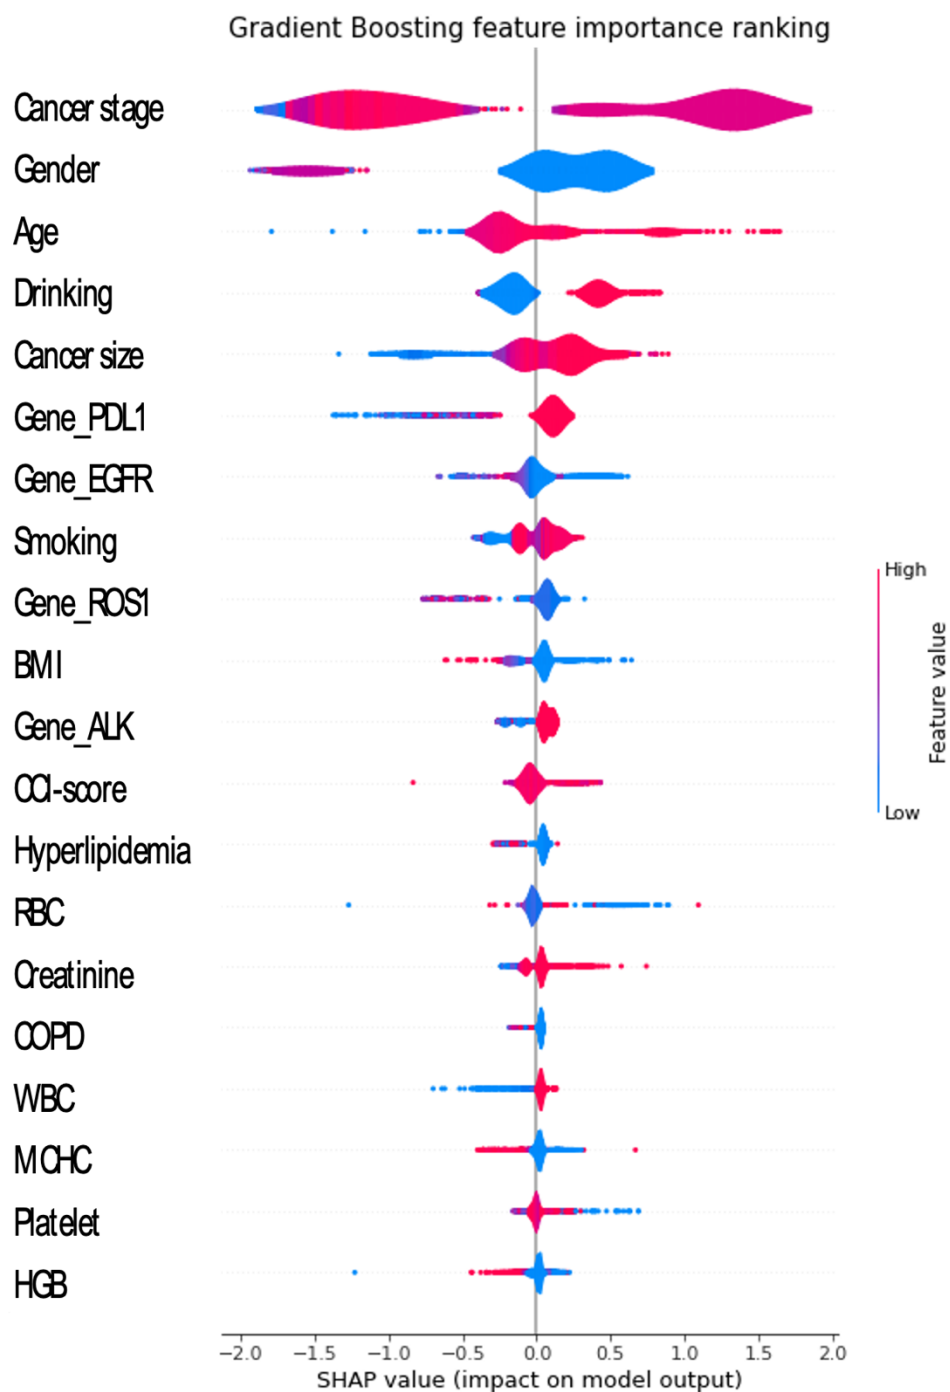

**Figure S2.** Feature Importance of the GBM Prediction Model of Mode 4

**Note:** BMI, Body mass index; EGFR, Epidermal growth factor receptor; RBC, Red blood cell; WBC, White blood cell; PD-L1, Programmed death-ligand 1; COPD, Chronic obstructive pulmonary disease; CCI, Charlson comorbidity index; ROS1, Proto-oncogene 1, receptor tyrosine-protein kinase; ALK, Anaplastic lymphoma kinase; MCHC, Mean corpuscular hemoglobin concentration; HGB, Hemoglobin;

**Table S1.** Detailed Demographic Characteristics of Cohort Patients

|                              | <b>Overall<br/>n = 3,714</b> | <b>Training cohort<sup>a</sup><br/>n = 2,280</b> | <b>Testing cohort<sup>b</sup><br/>n = 1,434</b> |
|------------------------------|------------------------------|--------------------------------------------------|-------------------------------------------------|
| <b>Gender, No. (%)</b>       |                              |                                                  |                                                 |
| Male                         | 2136 (57.5)                  | 1258 (55.2)                                      | 878 (61.2)                                      |
| Female                       | 1578 (42.5)                  | 1022 (44.8)                                      | 556 (38.8)                                      |
| <b>Age, Mean (SD), yrs.</b>  |                              |                                                  |                                                 |
| Mean (SD)                    | 68.0 (13.7)                  | 67.9 (13.8)                                      | 68.0 (13.4)                                     |
| Median [IQR]                 | 68.0 [59 – 79]               | 68.0 [59 – 79]                                   | 68.0 [58 – 78]                                  |
| <b>BMI</b>                   |                              |                                                  |                                                 |
| Mean (SD)                    | 23.4 (4.33)                  | 23.4 (3.93)                                      | 23.4 (4.81)                                     |
| Median [IQR]                 | 23.1 [20.8 – 25.5]           | 23.1 [20.8 – 25.6]                               | 23.0 [20.6 – 25.5]                              |
| Unknown                      | 1611 (43.4)                  | 1082 (47.5)                                      | 529 (36.9)                                      |
| <b>Smoking, No. (%)</b>      |                              |                                                  |                                                 |
| No                           | 1170 (31.5)                  | 710 (31.1)                                       | 460 (32.1)                                      |
| Yes                          | 993 (26.7)                   | 523 (22.9)                                       | 470 (32.8)                                      |
| Unknown                      | 1551 (41.8)                  | 1047 (45.9)                                      | 504 (35.1)                                      |
| <b>Drinking, No. (%)</b>     |                              |                                                  |                                                 |
| No                           | 1750 (47.1)                  | 983 (43.1)                                       | 767 (53.5)                                      |
| Yes                          | 408 (11.0)                   | 247 (10.8)                                       | 161 (11.2)                                      |
| Unknown                      | 1556 (41.9)                  | 1050 (46.1)                                      | 506 (35.3)                                      |
| <b>Tumor size, cm</b>        |                              |                                                  |                                                 |
| Mean (SD)                    | 4.23 (2.45)                  | 4.11 (2.39)                                      | 4.46 (2.55)                                     |
| Median [IQR]                 | 3.8 [2.4 – 5.5]              | 3.6 [2.3 – 5.5]                                  | 4.0 [2.5 – 5.7]                                 |
| Unknown                      | 972 (26.2)                   | 537 (23.6)                                       | 435 (30.3)                                      |
| <b>Cancer stage, No. (%)</b> |                              |                                                  |                                                 |
| stage = 0                    | 11 (0.3)                     | 10 (0.4)                                         | 1 (0.1)                                         |
| stage = 1                    | 533 (14.4)                   | 348 (15.3)                                       | 185 (12.9)                                      |
| stage = 2                    | 139 (3.7)                    | 88 (3.9)                                         | 51 (3.6)                                        |
| stage = 3                    | 527 (14.2)                   | 330 (14.5)                                       | 197 (13.7)                                      |
| stage = 4                    | 2034 (54.8)                  | 1207 (52.9)                                      | 827 (57.7)                                      |
| Unknown                      | 470 (12.7)                   | 297 (13.0)                                       | 173 (12.1)                                      |

**Table S1.** Detailed Demographic Characteristics of Cohort Patients (Continued)

|                     | <b>Overall<br/>n = 3,714</b> | <b>Training cohort<sup>a</sup><br/>n = 2,280</b> | <b>Testing cohort<sup>b</sup><br/>n = 1,434</b> |
|---------------------|------------------------------|--------------------------------------------------|-------------------------------------------------|
| <b>Genomic Test</b> |                              |                                                  |                                                 |
| <b>ALK, N (%)</b>   |                              |                                                  |                                                 |
| Negative            | 681 (18.3)                   | 457 (20.0)                                       | 224 (15.6)                                      |
| Positive            | 39 (1.1)                     | 21 (0.9)                                         | 18 (1.3)                                        |
| Unknown             | 2994 (80.6)                  | 1802 (79.0)                                      | 1192 (83.1)                                     |
| <b>EGFR, N (%)</b>  |                              |                                                  |                                                 |
| Negative            | 842 (22.7)                   | 473 (20.7)                                       | 369 (25.7)                                      |
| Positive            | 787 (21.2)                   | 467 (20.5)                                       | 320 (22.3)                                      |
| Unknown             | 2085 (56.1)                  | 1340 (58.8)                                      | 745 (52.0)                                      |
| <b>KRAS, N (%)</b>  |                              |                                                  |                                                 |
| Negative            | 45 (1.2)                     | 32 (1.4)                                         | 13 (0.9)                                        |
| Positive            | 5 (0.1)                      | 2 (0.1)                                          | 3 (0.2)                                         |
| Unknown             | 3664 (98.7)                  | 2246 (98.5)                                      | 1418 (98.9)                                     |
| <b>PDL1, N (%)</b>  |                              |                                                  |                                                 |
| Negative            | 269 (7.2)                    | 149 (6.5)                                        | 120 (8.4)                                       |
| Positive            | 66 (1.8)                     | 42 (1.8)                                         | 24 (1.7)                                        |
| Unknown             | 3379 (91.0)                  | 2089 (91.6)                                      | 1290 (90.0)                                     |
| <b>ROS1, N (%)</b>  |                              |                                                  |                                                 |
| Negative            | 288 (7.8)                    | 287 (12.6)                                       | 1 (0.1)                                         |
| Positive            | 29 (0.8)                     | 27 (1.2)                                         | 2 (0.1)                                         |
| Unknown             | 3397 (91.4)                  | 1966 (86.2)                                      | 1431 (99.8)                                     |

**Table S1.** Detailed Demographic Characteristics of Cohort Patients (Continued)

|                                         | <b>Overall<br/>n = 3,714</b> | <b>Training cohort<sup>a</sup><br/>n = 2,280</b> | <b>Testing cohort<sup>b</sup><br/>n = 1,434</b> |
|-----------------------------------------|------------------------------|--------------------------------------------------|-------------------------------------------------|
| <b>Comorbidity, N (%)</b>               |                              |                                                  |                                                 |
| CVD problems                            | 432 (11.6)                   | 296 (13.0)                                       | 136 (9.5)                                       |
| Dementia                                | 124 (3.3)                    | 71 (3.1)                                         | 53 (3.7)                                        |
| COPD                                    | 599 (16.1)                   | 391 (17.1)                                       | 208 (14.5)                                      |
| Rheumatic disease                       | 28 (0.75)                    | 16 (0.7)                                         | 12 (0.8)                                        |
| PUD                                     | 365 (9.8)                    | 246 (10.8)                                       | 119 (8.3)                                       |
| Renal disease                           | 128 (3.4)                    | 92 (4.0)                                         | 31 (2.2)                                        |
| Liver disease                           | 211 (5.7)                    | 147 (6.4)                                        | 64 (4.5)                                        |
| DM                                      | 372 (10.0)                   | 248 (10.9)                                       | 124 (8.6)                                       |
| Anemia                                  | 107 (2.9)                    | 76 (3.3)                                         | 31 (2.2)                                        |
| Depression                              | 245 (6.6)                    | 175 (7.7)                                        | 70 (4.9)                                        |
| Hyperlipidemia                          | 516 (13.9)                   | 385 (16.9)                                       | 131 (9.1)                                       |
| Hypertension                            | 736 (19.8)                   | 503 (22.1)                                       | 233 (16.2)                                      |
| Parkinson's disease                     | 50 (1.3)                     | 29 (1.3)                                         | 21 (1.5)                                        |
| <b>Charlson Comorbidity Index (CCI)</b> |                              |                                                  |                                                 |
| Mean (SD)                               | 3.08 (2.07)                  | 3.13 (2.19)                                      | 2.97 (1.86)                                     |
| Median [IQR]                            | 3.0 [2.0 – 4.0]              | 3.0 [2.0 – 4.0]                                  | 3.0 [2.0 – 4.0]                                 |
| <b>Follow-up, yrs.</b>                  |                              |                                                  |                                                 |
| Mean (SD)                               | 2.25 (2.47)                  | 2.44 (2.61)                                      | 1.96 (2.19)                                     |
| Median [IQR]                            | 1.41 [0.46 – 3.04]           | 1.51 [0.53 – 3.36]                               | 1.24 [0.38 – 2.64]                              |

**Table S1.** Detailed Demographic Characteristics of Cohort Patients (Continued)

|                               | Overall<br>n = 3,714 | Training cohort <sup>a</sup><br>n = 2,280 | Testing cohort <sup>b</sup><br>n = 1,434 |
|-------------------------------|----------------------|-------------------------------------------|------------------------------------------|
| <b>Laboratory test result</b> |                      |                                           |                                          |
| <b>Basophil</b>               |                      |                                           |                                          |
| Mean (SD)                     | 0.51 (0.40)          | 0.53 (0.42)                               | 0.484 (0.39)                             |
| Median [IQR]                  | 0.40 [0.2 – 0.7]     | 0.50 [0.3 – 0.7]                          | 0.40 [0.2 – 0.7]                         |
| Missing                       | 2450 (66.0)          | 1648 (72.3)                               | 802 (55.9)                               |
| <b>BUN</b>                    |                      |                                           |                                          |
| Mean (SD)                     | 19.4 (14.9)          | 18.8 (13.1)                               | 20.5 (17.6)                              |
| Median [IQR]                  | 16.0 [12 – 21]       | 15.8 [12 – 21]                            | 16.0 [11.4 – 22]                         |
| Missing                       | 2256 (60.7)          | 1350 (59.2)                               | 906 (63.2)                               |
| <b>Creatinine</b>             |                      |                                           |                                          |
| Mean (SD)                     | 1.05 (0.98)          | 1.02 (0.90)                               | 1.10 (1.07)                              |
| Median [IQR]                  | 0.86 [0.7 – 1.08]    | 0.85 [0.7 – 1.07]                         | 0.86 [0.7 – 1.09]                        |
| Missing                       | 1442 (38.8)          | 957 (42.0)                                | 485 (33.8)                               |
| <b>Eosinophil</b>             |                      |                                           |                                          |
| Mean (SD)                     | 1.89 (2.31)          | 2.03 (2.59)                               | 1.76 (1.97)                              |
| Median [IQR]                  | 1.20 [0.4 – 2.5]     | 1.30 [0.5 – 2.7]                          | 1.10 [0.4 – 2.4]                         |
| Missing                       | 2450 (66.0)          | 1648 (72.3)                               | 802 (55.9)                               |
| <b>HCT</b>                    |                      |                                           |                                          |
| Mean (SD)                     | 38.3 (5.69)          | 38.5 (5.61)                               | 37.9 (5.80)                              |
| Median [IQR]                  | 38.7 [35.0 – 42.2]   | 39.0 [35.2 – 42.5]                        | 38.1 [34.4 – 41.8]                       |
| Missing                       | 1914 (51.5)          | 1188 (52.1)                               | 726 (50.6)                               |
| <b>HGB</b>                    |                      |                                           |                                          |
| Mean (SD)                     | 12.9 (1.97)          | 13.0 (1.91)                               | 12.7 (2.05)                              |
| Median [IQR]                  | 13.0 [11.6 – 14.3]   | 13.1 [11.7 – 14.4]                        | 12.9 [11.4 – 14.2]                       |
| Missing                       | 1854 (49.9)          | 1135 (49.8)                               | 719 (50.1)                               |
| <b>K</b>                      |                      |                                           |                                          |
| Mean (SD)                     | 3.99 (0.56)          | 4.02 (0.53)                               | 3.95 (0.60)                              |
| Median [IQR]                  | 4.00 [3.6 – 4.3]     | 4.00 [3.7 – 4.3]                          | 3.90 [3.6 – 4.3]                         |
| Missing                       | 2140 (57.6)          | 1325 (58.1)                               | 815 (56.8)                               |
| <b>Lymphocyte</b>             |                      |                                           |                                          |
| Mean (SD)                     | 18.7 (9.98)          | 19.6 (9.55)                               | 17.8 (10.3)                              |
| Median [IQR]                  | 17.5 [11.1 – 25.1]   | 18.8 [12.7 – 25.6]                        | 16.4 [10.0 – 24.4]                       |
| Missing                       | 2450 (66.0)          | 1648 (72.3)                               | 802 (55.9)                               |
| <b>MCH</b>                    |                      |                                           |                                          |
| Mean (SD)                     | 29.9 (3.02)          | 29.9 (3.03)                               | 29.8 (3.00)                              |
| Median [IQR]                  | 30.3 [28.9 – 31.6]   | 30.4 [29 – 31.7]                          | 30.2 [28.7 – 31.6]                       |
| Missing                       | 1996 (53.7)          | 1259 (55.2)                               | 737 (51.4)                               |
| <b>MCHC</b>                   |                      |                                           |                                          |
| Mean (SD)                     | 33.6 (0.95)          | 33.7 (0.96)                               | 33.6 (0.94)                              |
| Median [IQR]                  | 33.7 [33.1 – 34.2]   | 33.7 [33.2 – 34.3]                        | 33.6 [33.1 – 34.2]                       |
| Missing                       | 1996 (53.7)          | 1259 (55.2)                               | 737 (51.4)                               |

|                   |                    |                    |                    |
|-------------------|--------------------|--------------------|--------------------|
| <b>MCV</b>        |                    |                    |                    |
| Mean (SD)         | 88.6 (7.61)        | 88.5 (7.64)        | 88.7 (7.57)        |
| Median [IQR]      | 89.5 [86 – 93.1]   | 89.4 [86 – 93.3]   | 89.7 [86.2 - 93]   |
| Missing           | 1947 (52.4)        | 1219 (53.5)        | 728 (50.8)         |
| <b>Monocyte</b>   |                    |                    |                    |
| Mean (SD)         | 7.45 (2.90)        | 7.42 (2.93)        | 7.48 (2.87)        |
| Median [IQR]      | 7.40 [5.6 – 9.2]   | 7.40 [5.5 – 9.2]   | 7.35 [5.6 – 9.2]   |
| Missing           | 2450 (66.0)        | 1648 (72.3)        | 802 (55.9)         |
| <b>Na</b>         |                    |                    |                    |
| Mean (SD)         | 137 (4.46)         | 137 (4.39)         | 137 (4.53)         |
| Median [IQR]      | 138 [135 - 140]    | 138 [135 - 140]    | 137 [134 - 139]    |
| Missing           | 2200 (59.2)        | 1373 (60.2)        | 827 (57.7)         |
| <b>Neutrophil</b> |                    |                    |                    |
| Mean (SD)         | 71.3 (11.9)        | 70.2 (11.4)        | 72.3 (12.2)        |
| Median [IQR]      | 71.9 [63.6 – 80]   | 70.6 [63 – 77.9]   | 73.1 [64 – 82]     |
| Missing           | 2450 (66.0)        | 1648 (72.3)        | 802 (55.9)         |
| <b>PLT</b>        |                    |                    |                    |
| Mean (SD)         | 263 (109)          | 258 (100)          | 269 (121)          |
| Median [IQR]      | 245 [196 – 308.8]  | 243 [197 – 300]    | 250 [194 – 320]    |
| Missing           | 1900 (51.2)        | 1167 (51.2)        | 733 (51.1)         |
| <b>RBC</b>        |                    |                    |                    |
| Mean (SD)         | 4.35 (0.68)        | 4.38 (0.67)        | 4.29 (0.69)        |
| Median [IQR]      | 4.37 [3.93 – 4.78] | 4.41 [3.97 – 4.81] | 4.32 [3.87 – 4.75] |
| Missing           | 1934 (52.1)        | 1206 (52.9)        | 728 (50.8)         |
| <b>WBC</b>        |                    |                    |                    |
| Mean (SD)         | 9.72 (5.38)        | 9.16 (4.16)        | 10.6 (6.80)        |
| Median [IQR]      | 8.55 [6.7 – 11.5]  | 8.19 [6.47 – 10.9] | 9.00 [6.9 – 12.4]  |
| Missing           | 1861 (50.1)        | 1142 (50.1)        | 719 (50.1)         |



**Table S1.** Detailed Demographic Characteristics of Cohort Patients (Continued)

|                                                                     | <b>Overall<br/>n = 3,714</b> | <b>Training cohort<sup>a</sup><br/>n = 2,280</b> | <b>Testing cohort<sup>b</sup><br/>n = 1,434</b> |
|---------------------------------------------------------------------|------------------------------|--------------------------------------------------|-------------------------------------------------|
| <b>Medication, N (%)</b>                                            |                              |                                                  |                                                 |
| <b>Alimentary tract and metabolism</b>                              | 591 (15.9)                   | 394 (17.3)                                       | 197 (14.7)                                      |
| A02AA - Magnesium compounds                                         | 61 (1.6)                     | 37 (1.6)                                         | 24 (1.7)                                        |
| A02AX - Antacids, other combinations                                | 80 (2.2)                     | 61 (2.7)                                         | 19 (1.3)                                        |
| A02BA - H2-receptor antagonists                                     | 115 (3.1)                    | 69 (3.0)                                         | 46 (3.2)                                        |
| A02BC - Proton pump inhibitors                                      | 107 (2.9)                    | 66 (2.9)                                         | 41 (2.9)                                        |
| A03AX - Other drugs for functional gastrointestinal disorders       | 79 (2.1)                     | 57 (2.5)                                         | 22 (1.5)                                        |
| A03FA - Propulsives                                                 | 114 (3.1)                    | 65 (2.9)                                         | 49 (3.4)                                        |
| A06AB - Contact laxatives                                           | 215 (5.8)                    | 163 (7.1)                                        | 52 (3.6)                                        |
| A06AD - Osmotically acting laxatives                                | 52 (1.4)                     | 42 (1.8)                                         | 10 (0.7)                                        |
| A10BA - Biguanides                                                  | 165 (4.4)                    | 118 (5.2)                                        | 47 (3.3)                                        |
| A10BB - Sulfonylureas                                               | 114 (3.1)                    | 78 (3.4)                                         | 36 (2.5)                                        |
| A10BH - Dipeptidyl peptidase 4 (DPP-4) inhibitors                   | 92 (2.5)                     | 66 (2.9)                                         | 26 (1.8)                                        |
| <b>Blood and blood-forming organs</b>                               | 446 (12.0)                   | 293 (12.9)                                       | 153 (11.3)                                      |
| B01AC - Platelet aggregation inhibitors                             | 420 (11.3)                   | 277 (12.1)                                       | 143 (10.0)                                      |
| B03BA - Vitamin B12 (cyanocobalamin and analogues)                  | 56 (1.5)                     | 33 (1.4)                                         | 23 (1.6)                                        |
| <b>Cardiovascular system</b>                                        | 675 (18.2)                   | 448 (19.6)                                       | 227 (16.9)                                      |
| C01DA - Organic nitrates                                            | 103 (2.8)                    | 72 (3.2)                                         | 31 (2.2)                                        |
| C01DX - Other vasodilators used in cardiac diseases                 | 103 (2.8)                    | 65 (2.9)                                         | 38 (2.7)                                        |
| C02CA - Alpha-adrenoreceptor antagonists                            | 58 (1.6)                     | 35 (1.5)                                         | 23 (1.6)                                        |
| C03AA - Thiazides, plain                                            | 63 (1.7)                     | 42 (1.8)                                         | 21 (1.5)                                        |
| C03CA - Sulfonamides, plain                                         | 99 (2.7)                     | 61 (2.7)                                         | 38 (2.7)                                        |
| C04AD - Purine derivatives                                          | 73 (2.0)                     | 45 (2.0)                                         | 28 (2.0)                                        |
| C07AB - Beta blocking agents, selective                             | 172 (4.6)                    | 111 (4.9)                                        | 61 (4.3)                                        |
| C07AG - Alpha and beta blocking agents                              | 75 (2.0)                     | 59 (2.6)                                         | 16 (1.1)                                        |
| C08CA - Dihydropyridine derivatives                                 | 271 (7.3)                    | 174 (7.6)                                        | 97 (6.8)                                        |
| C08DB - Benzothiazepine derivatives                                 | 83 (2.2)                     | 64 (2.8)                                         | 19 (1.3)                                        |
| C09CA - Angiotensin II receptor blockers (ARBs), plain              | 288 (7.8)                    | 191 (8.4)                                        | 97 (6.8)                                        |
| C10AA - HMG CoA reductase inhibitors                                | 294 (7.9)                    | 211 (9.3)                                        | 83 (5.8)                                        |
| <b>Genitourinary system and hormones</b>                            | 132 (3.6)                    | 74 (3.2)                                         | 58 (4.3)                                        |
| G04CA - Alpha-adrenoreceptor antagonists                            | 132 (3.6)                    | 74 (3.2)                                         | 58 (4.0)                                        |
| <b>Musculo-skeletal system</b>                                      | 252 (6.8)                    | 141 (6.2)                                        | 111 (8.3)                                       |
| M01AH - Coxibs                                                      | 108 (2.9)                    | 53 (2.3)                                         | 55 (3.8)                                        |
| M02AA - Antiinflammatory preparations, non-steroids for topical use | 92 (2.5)                     | 43 (1.9)                                         | 49 (3.4)                                        |
| M03BB - Oxazol, thiazine, and triazine derivatives                  | 52 (1.4)                     | 27 (1.2)                                         | 25 (1.7)                                        |
| M04AB - Preparations increasing uric acid excretion                 | 63 (1.7)                     | 45 (2.0)                                         | 18 (1.3)                                        |

|                                                                |            |            |            |
|----------------------------------------------------------------|------------|------------|------------|
| <b>Nervous system</b>                                          | 391 (10.5) | 254 (11.1) | 137 (10.2) |
| N03AE - Benzodiazepine derivatives (Antiepileptics)            | 61 (1.6)   | 35 (1.5)   | 26 (1.8)   |
| N05BA - Benzodiazepine derivatives (Anxiolytics)               | 167 (4.5)  | 118 (5.2)  | 49 (3.4)   |
| N05CD - Benzodiazepine derivatives (Hypnotics and sedatives)   | 81 (2.2)   | 50 (2.2)   | 31 (2.2)   |
| N05CF - Benzodiazepine related drugs (Hypnotics and sedatives) | 69 (1.9)   | 40 (1.8)   | 29 (2.0)   |
| N06BX - Other psychostimulants and nootropics                  | 65 (1.8)   | 39 (1.7)   | 26 (1.8)   |
| N07CA - Antivertigo preparations                               | 77 (2.1)   | 51 (2.2)   | 26 (1.8)   |
| <b>Respiratory system</b>                                      | 319 (8.6)  | 226 (9.9)  | 93 (6.9)   |
| R03CC - Selective beta-2-adrenoreceptor agonists               | 50 (1.3)   | 37 (1.6)   | 13 (0.9)   |
| R03DA - Xanthines                                              | 156 (4.2)  | 102 (4.5)  | 54 (3.8)   |
| R05CB - Mucolytics                                             | 185 (5.0)  | 136 (6.0)  | 49 (3.4)   |
| R05DA - Opium alkaloids and derivatives                        | 63 (1.7)   | 36 (1.6)   | 27 (1.9)   |
| R05FA - Opium derivatives and expectorants                     | 78 (2.1)   | 50 (2.2)   | 28 (2.0)   |
| R06AX - Other antihistamines for systemic use                  | 66 (1.8)   | 49 (2.1)   | 17 (1.2)   |

**Note:** SD, Standard deviation; yrs., Years; IQR, Interquartile Range; BMI, Body mass index; COPD, Chronic obstructive pulmonary disease; PUD, Peptic ulcer disease; CVD, Cardiovascular; DM, Diabetes; BUN, Blood urea nitrogen; HCT, Hematocrit; HGB, Hemoglobin; K, Potassium; MCH, Mean corpuscular hemoglobin; MCHC, Mean corpuscular hemoglobin concentration; MCV, Mean corpuscular volume; Na, Sodium; PLT, Platelet; RBC, Red blood count; WBC, White blood count;

<sup>a</sup>The training set included the data from Taipei Medical University and Wan-Fang hospitals;

<sup>b</sup>The testing set included the data from Shuang Ho hospital;

Table S2. Detailed Performance of various Prediction Models by Modes

| Modes  | Models      | Training_AUC | Testing_AUC | Accuracy    | Sensitivity | Specificity | PPV         | NPV         | F1-score    |
|--------|-------------|--------------|-------------|-------------|-------------|-------------|-------------|-------------|-------------|
| Mode 1 | LR          | 0.70         | 0.72        | 0.65        | 0.64        | 0.69        | 0.88        | 0.36        | 0.75        |
|        | LDA         | 0.78         | 0.78        | 0.71        | 0.70        | 0.72        | 0.90        | 0.42        | 0.80        |
|        | LGBM        | 0.98         | 0.81        | 0.73        | 0.72        | 0.77        | 0.92        | 0.45        | 0.81        |
|        | GBM         | 0.96         | 0.83        | 0.75        | 0.76        | 0.74        | 0.91        | 0.47        | 0.84        |
|        | XGBoost     | 1.00         | 0.80        | 0.75        | 0.77        | 0.70        | 0.90        | 0.47        | 0.84        |
|        | RF          | 0.90         | 0.82        | 0.72        | 0.70        | 0.79        | 0.92        | 0.43        | 0.80        |
|        | Ada Boost   | 0.94         | 0.81        | 0.73        | 0.72        | 0.75        | 0.91        | 0.44        | 0.81        |
|        | SVC         | 0.78         | 0.78        | 0.71        | 0.72        | 0.70        | 0.89        | 0.42        | 0.81        |
|        | <b>ANN*</b> | <b>0.89</b>  | <b>0.88</b> | <b>0.82</b> | <b>0.75</b> | <b>0.71</b> | <b>0.90</b> | <b>0.45</b> | <b>0.64</b> |
| Mode 2 | LR          | 0.74         | 0.75        | 0.60        | 0.53        | 0.85        | 0.93        | 0.35        | 0.67        |
|        | LDA         | 0.81         | 0.79        | 0.71        | 0.70        | 0.74        | 0.90        | 0.42        | 0.80        |
|        | LGBM        | 0.99         | 0.83        | 0.78        | 0.79        | 0.73        | 0.91        | 0.51        | 0.86        |
|        | GBM         | 0.96         | 0.84        | 0.78        | 0.80        | 0.71        | 0.91        | 0.51        | 0.87        |
|        | XGBoost     | 1.00         | 0.81        | 0.78        | 0.81        | 0.68        | 0.90        | 0.51        | 0.86        |
|        | RF          | 0.92         | 0.83        | 0.69        | 0.64        | 0.86        | 0.94        | 0.41        | 0.76        |
|        | Ada Boost   | 0.95         | 0.80        | 0.74        | 0.76        | 0.70        | 0.90        | 0.46        | 0.83        |
|        | SVC         | 0.81         | 0.79        | 0.70        | 0.68        | 0.77        | 0.91        | 0.41        | 0.78        |
|        | <b>ANN*</b> | <b>0.89</b>  | <b>0.89</b> | <b>0.80</b> | <b>0.75</b> | <b>0.74</b> | <b>0.91</b> | <b>0.46</b> | <b>0.64</b> |
| Mode 3 | LR          | 0.70         | 0.73        | 0.65        | 0.63        | 0.70        | 0.88        | 0.36        | 0.74        |
|        | LDA         | 0.80         | 0.81        | 0.75        | 0.76        | 0.73        | 0.91        | 0.47        | 0.83        |
|        | LGBM        | 0.98         | 0.85        | 0.80        | 0.81        | 0.75        | 0.92        | 0.54        | 0.87        |
|        | GBM         | 0.96         | 0.85        | 0.79        | 0.79        | 0.77        | 0.92        | 0.52        | 0.86        |
|        | XGBoost     | 1.00         | 0.83        | 0.79        | 0.80        | 0.74        | 0.91        | 0.52        | 0.86        |
|        | RF          | 0.91         | 0.84        | 0.72        | 0.69        | 0.83        | 0.93        | 0.44        | 0.80        |
|        | Ada Boost   | 0.95         | 0.83        | 0.79        | 0.80        | 0.73        | 0.91        | 0.52        | 0.86        |
|        | SVC         | 0.80         | 0.81        | 0.75        | 0.75        | 0.72        | 0.90        | 0.46        | 0.83        |
|        | <b>ANN*</b> | <b>0.89</b>  | <b>0.89</b> | <b>0.83</b> | <b>0.81</b> | <b>0.67</b> | <b>0.89</b> | <b>0.50</b> | <b>0.64</b> |

|               |             |             |             |             |             |             |             |             |             |
|---------------|-------------|-------------|-------------|-------------|-------------|-------------|-------------|-------------|-------------|
| <b>Mode 4</b> | LR          | 0.74        | 0.75        | 0.61        | 0.53        | 0.85        | 0.93        | 0.35        | 0.67        |
|               | LDA         | 0.83        | 0.82        | 0.76        | 0.77        | 0.72        | 0.90        | 0.48        | 0.84        |
|               | LGBM        | 0.99        | 0.86        | 0.81        | 0.83        | 0.74        | 0.92        | 0.55        | 0.88        |
|               | GBM         | 0.97        | 0.85        | 0.79        | 0.81        | 0.75        | 0.92        | 0.53        | 0.87        |
|               | XGBoost     | 1.00        | 0.84        | 0.77        | 0.77        | 0.78        | 0.92        | 0.49        | 0.85        |
|               | RF          | 0.93        | 0.85        | 0.75        | 0.73        | 0.81        | 0.93        | 0.46        | 0.82        |
|               | Ada Boost   | 0.96        | 0.83        | 0.76        | 0.75        | 0.77        | 0.92        | 0.48        | 0.83        |
|               | SVC         | 0.83        | 0.81        | 0.75        | 0.76        | 0.72        | 0.90        | 0.46        | 0.84        |
|               | <b>ANN*</b> | <b>0.89</b> | <b>0.89</b> | <b>0.82</b> | <b>0.75</b> | <b>0.73</b> | <b>0.91</b> | <b>0.46</b> | <b>0.65</b> |

**Note:** LR, Logistic Regression; LDA, Linear Discriminant Analysis; LGBM, Light Gradient Boosting Machine; GBM, Gradient Boosting Machine; XGBoost, Extreme Gradient Boosting; RF, Random Forest; SVC, Support Vector Machine; ANN, Artificial Neural Network; \*, Best model based on AUC values;
